# Supplementary material for: Improving supercapacitor performance of alkylated graphene nanosheets via partial fluorination on their alkyl chains
Source: Royal Society of Chemistry journal article supplement (doi:10.1039/c5ra19779a), 2015-01-01
Supplement: c5ra19779a1.pdf [file c5ra19779a1.pdf]

**Electronic Supplementary Information**

**Improving supercapacitor performance of alkylated  
graphene nanosheets via partial fluorination on their  
alkyl chains**

Gang Zhao,<sup>a, #</sup> Fu-Gang Zhao,<sup>b, #</sup> Jianqing Sun,<sup>a, #</sup> Wei Wang,<sup>a</sup> Yang Lu,<sup>a</sup> Wei-Shi  
Li,<sup>\*,b</sup> Qing-Yun Chen<sup>\*,a</sup>

<sup>a</sup> *Key Laboratory of organofluorine Chemistry, Shanghai Institute of Organic  
Chemistry, Chinese Academy of Sciences, 345 Lingling Road, Shanghai  
200032, P.R. China*

<sup>b</sup> *Laboratory of Synthetic and Self-Assembly of Organic Functional  
Molecules, Shanghai Institute of Organic Chemistry, Chinese Academy of  
Sciences, 345 Lingling Road, Shanghai 200032, P. R. China.*

<sup>#</sup> These authors contribute to this work equally.

To whom correspondence should be addressed: E-mail: liws@mail.sioc.ac.cn  
(W.S.L.), chenqy@mail.sioc.ac.cn (Q.Y.C.)

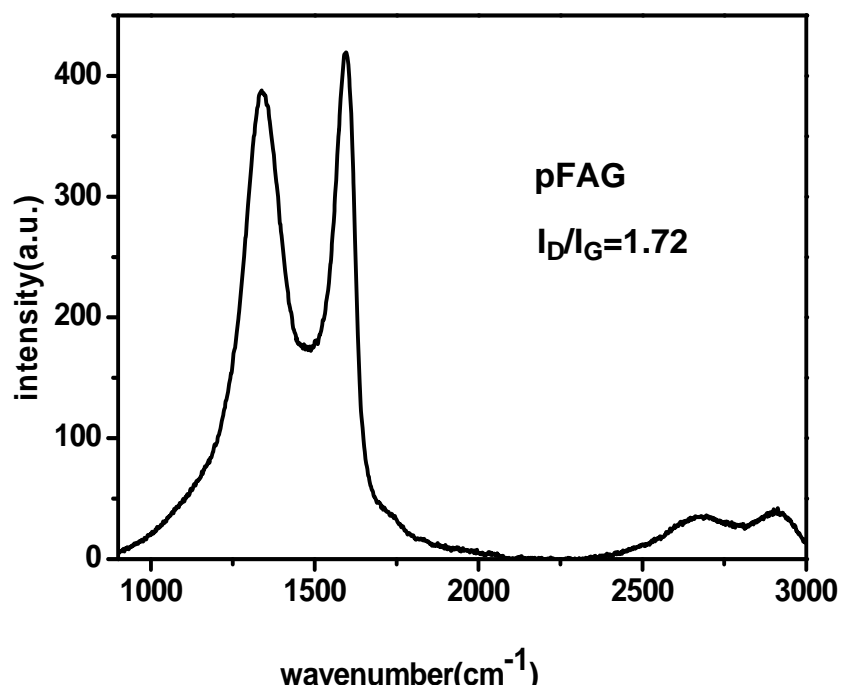

**Fig. S1** Raman spectrum of **pFAG**.

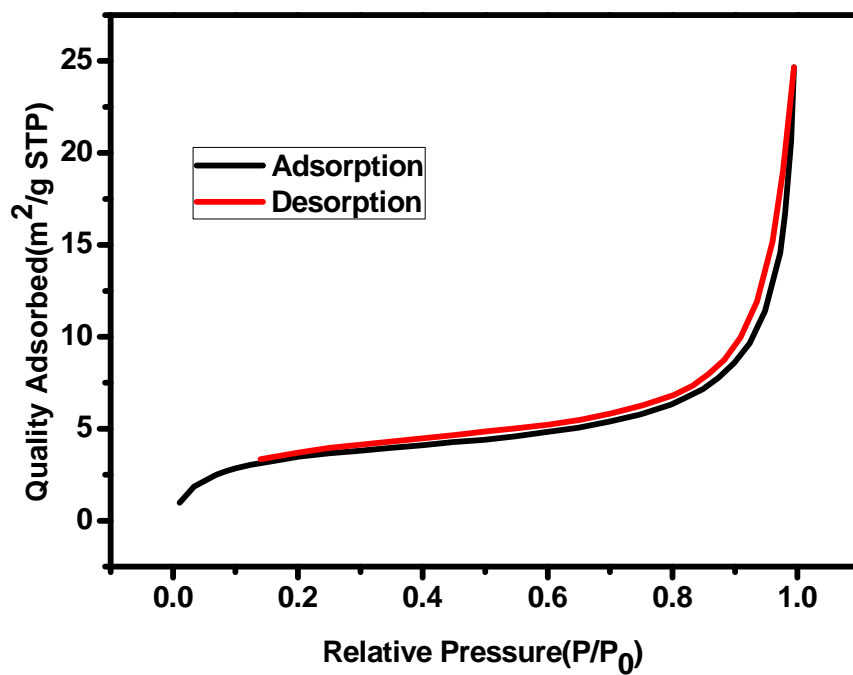

**Fig. S2** Nitrogen adsorption and desorption isotherms of **pFAG**.

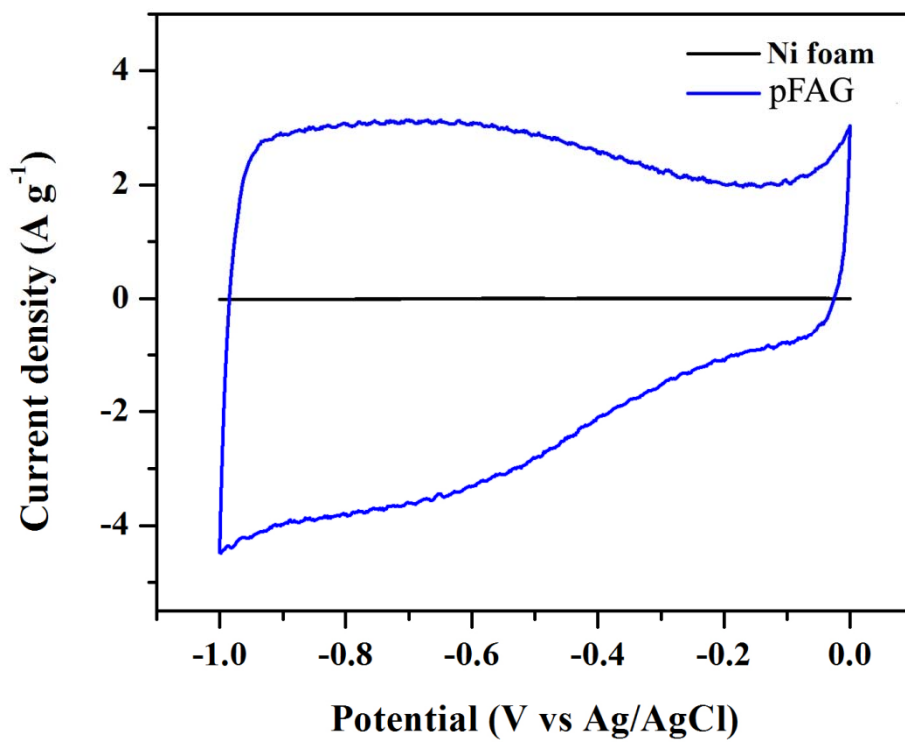

**Fig. S3** CV curves of pFAG electrode and Ni foam only at a scan rate of 20 mV s<sup>-1</sup>.
